# Supplementary material for: Effects of a lifestyle intervention programme after 1 year of follow-up among South Asians at high risk of type 2 diabetes: a cluster randomised controlled trial
Source: PubMed Central journal article supplement — BMJ Glob Health. 2021 Nov 1;6(11):e006479. doi: 10.1136/bmjgh-2021-006479 (PMC8562508; doi:10.1136/bmjgh-2021-006479), 2021-11-01
Supplement: bmjgh-2021-006479supp001.pdf [file bmjgh-2021-006479supp001.pdf]

**Supplementary material 1**

## Behavioural changes

No effect of the intervention compared to the control was observed on smoking status, alcohol consumption or METs of moderate to vigorous activity between baseline and 12 months of follow-up. Physical activity increased in both the intervention and the control group ((from 300 MET [IQR 190; 1,440] to 500 MET [IQR 80; 1,040] and from 240 MET [IQR 125; 1,320] to 440 MET [IQR 80; 920] respectively; adjusted group difference -29 MET [95% CI -296; 239]).

**Supplementary table 1**

|                                                   | <b>Intervention group</b> | <b>Control group</b> |
|---------------------------------------------------|---------------------------|----------------------|
| <b>Number of participants</b>                     | 1,838                     | 1,846                |
| <b>Age (Years), median (IQR)</b>                  | 52.4 (45.7-60.2)          | 52.6 (46.7-60.4)     |
| <b>Setting, (%) n</b>                             |                           |                      |
| Urban                                             | 64.0% (1176)              | 62.5% (1154)         |
| Semi-urban                                        | 3.3% (60)                 | 1.6% (30)            |
| Rural                                             | 32.8% (602)               | 35.9% (662)          |
| <b>Schooling, (%) n</b>                           |                           |                      |
| Not reported                                      | 16.5% (303)               | 14.8% (274)          |
| No schooling                                      | 8.8% (161)                | 15.1% (278)          |
| Primary school                                    | 9.9% (182)                | 11.1% (204)          |
| Secondary school                                  | 25.9% (476)               | 21.6% (399)          |
| High school                                       | 17.5% (321)               | 17.8% (329)          |
| University degree                                 | 15.0% (275)               | 13.6% (251)          |
| Postgraduate                                      | 6.5% (120)                | 6.0% (111)           |
| <b>Weight (kg), mean (SD)</b>                     | 80.3 (13.7)               | 79.2 (13.5)          |
| <b>BMI (kg/m<sup>2</sup>), mean (SD)</b>          | 30.3 (4.5)                | 30.2 (4.6)           |
| <b>Waist circumference (cm), mean (SD)</b>        | 104 (9.4)                 | 104 (9.3)            |
| <b>SBP (mm/hg), mean (SD)</b>                     | 131 (16.9)                | 132 (17.1)           |
| <b>DBP (mm/hg), mean (SD)</b>                     | 81.0 (10.2)               | 81.6 (10.4)          |
| <b>HbA1c (mmol/L), mean (SD)</b>                  | 5.8 (0.4)                 | 5.8 (0.4)            |
| <b>Smoking status % (n)</b>                       |                           |                      |
| Never                                             | 86.0% (1581)              | 86.2% (1592)         |
| Ex-smoker                                         | 8.6% (158)                | 7.7% (143)           |
| Current smoker                                    | 5.4% (99)                 | 6.1% (112)           |
| <b>Alcohol consumption last month % (n)</b>       |                           |                      |
| No                                                | 81.9% (1506)              | 85.2% (1573)         |
| Yes                                               | 18.1% (332)               | 14.8% (274)          |
| <b>Physical activity (MET/week), median (IQR)</b> | 300 (0-1440)              | 240 (0-1320)         |
| <b>Sedentary (min/week), median (IQR)</b>         | 460 (180-480)             | 360 (180-480)        |
